# Supplementary material
Source: PubMed Central journal article supplement (PMC7195006)
Supplement: mmc1.pdf [file mmc1.pdf]

**Supplemental Information**

**Complex Genetic Architecture Underlies**

**Regulation of Influenza-A-Virus-Specific**

**Antibody Responses in the Collaborative Cross**

**Kelsey E. Noll, Alan C. Whitmore, Ande West, Mary K. McCarthy, Clayton R. Morrison, Kenneth S. Plante, Brea K. Hampton, Heike Kollmus, Carolin Pilzner, Sarah R. Leist, Lisa E. Gralinski, Vineet D. Menachery, Alexandra Schäfer, Darla Miller, Ginger Shaw, Michael Mooney, Shannon McWeeney, Fernando Pardo-Manuel de Villena, Klaus Schughart, Thomas E. Morrison, Ralph S. Baric, Martin T. Ferris, and Mark T. Heise**

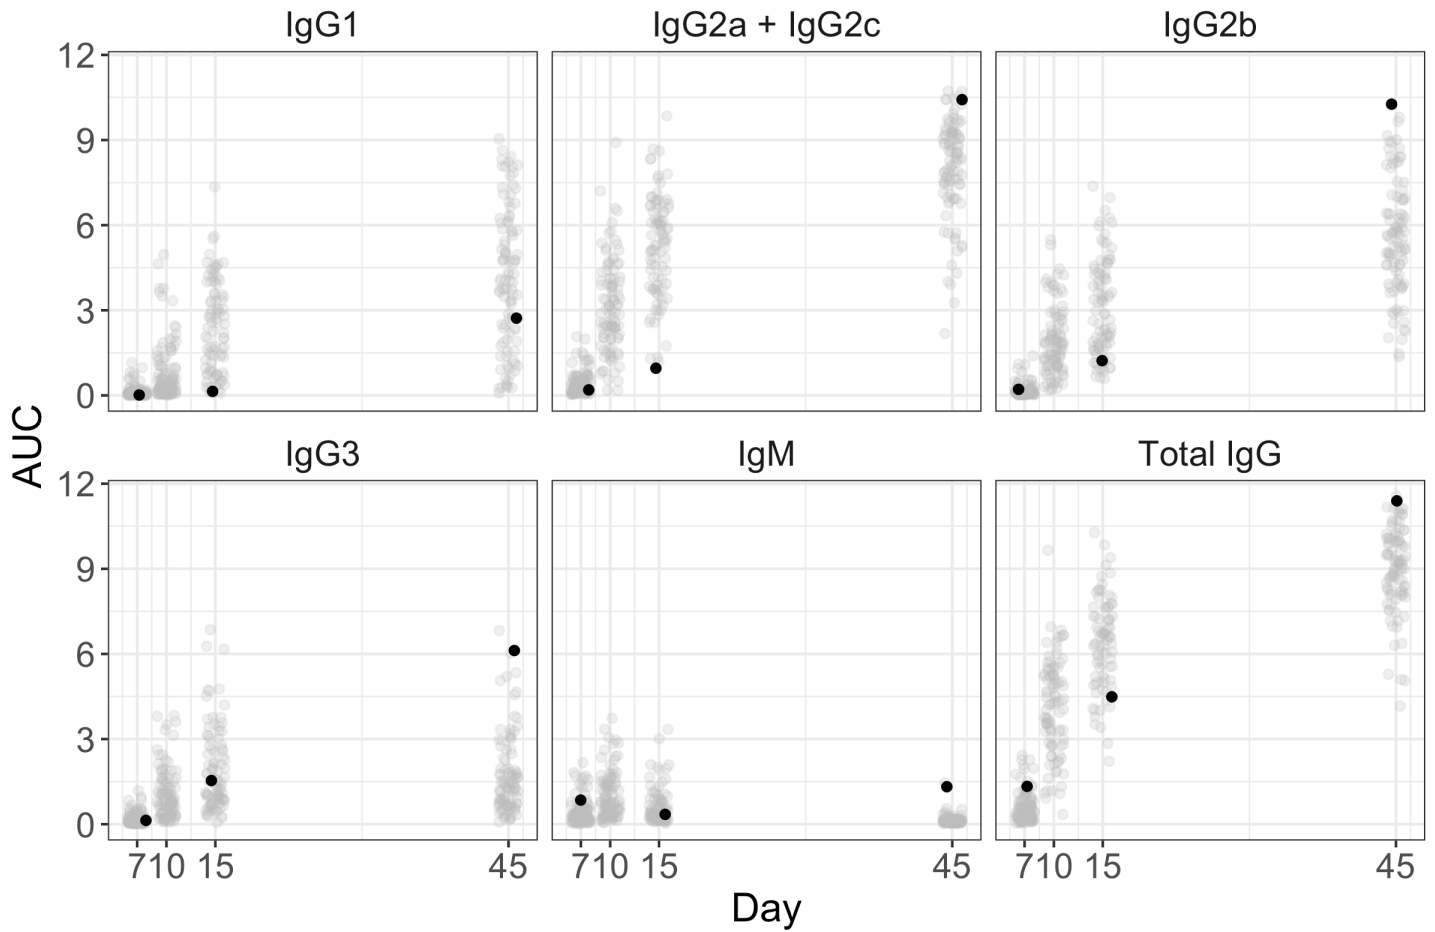

**Figure S1. CC-F1s varied significantly in overall levels and kinetics of the IAV-specific antibody response.** CC003xCC062 (black) represents a notable outlier, showing significantly higher antibody levels at day 45-post infection compared to the rest of the F1s (grey) for all antibody types besides IgG1, despite low-to-normal responses at earlier timepoints (day 10 = no data). Points represent mean values for CC-F1s, with approximately 3 mice per CC-F1. Related to Figure 1.

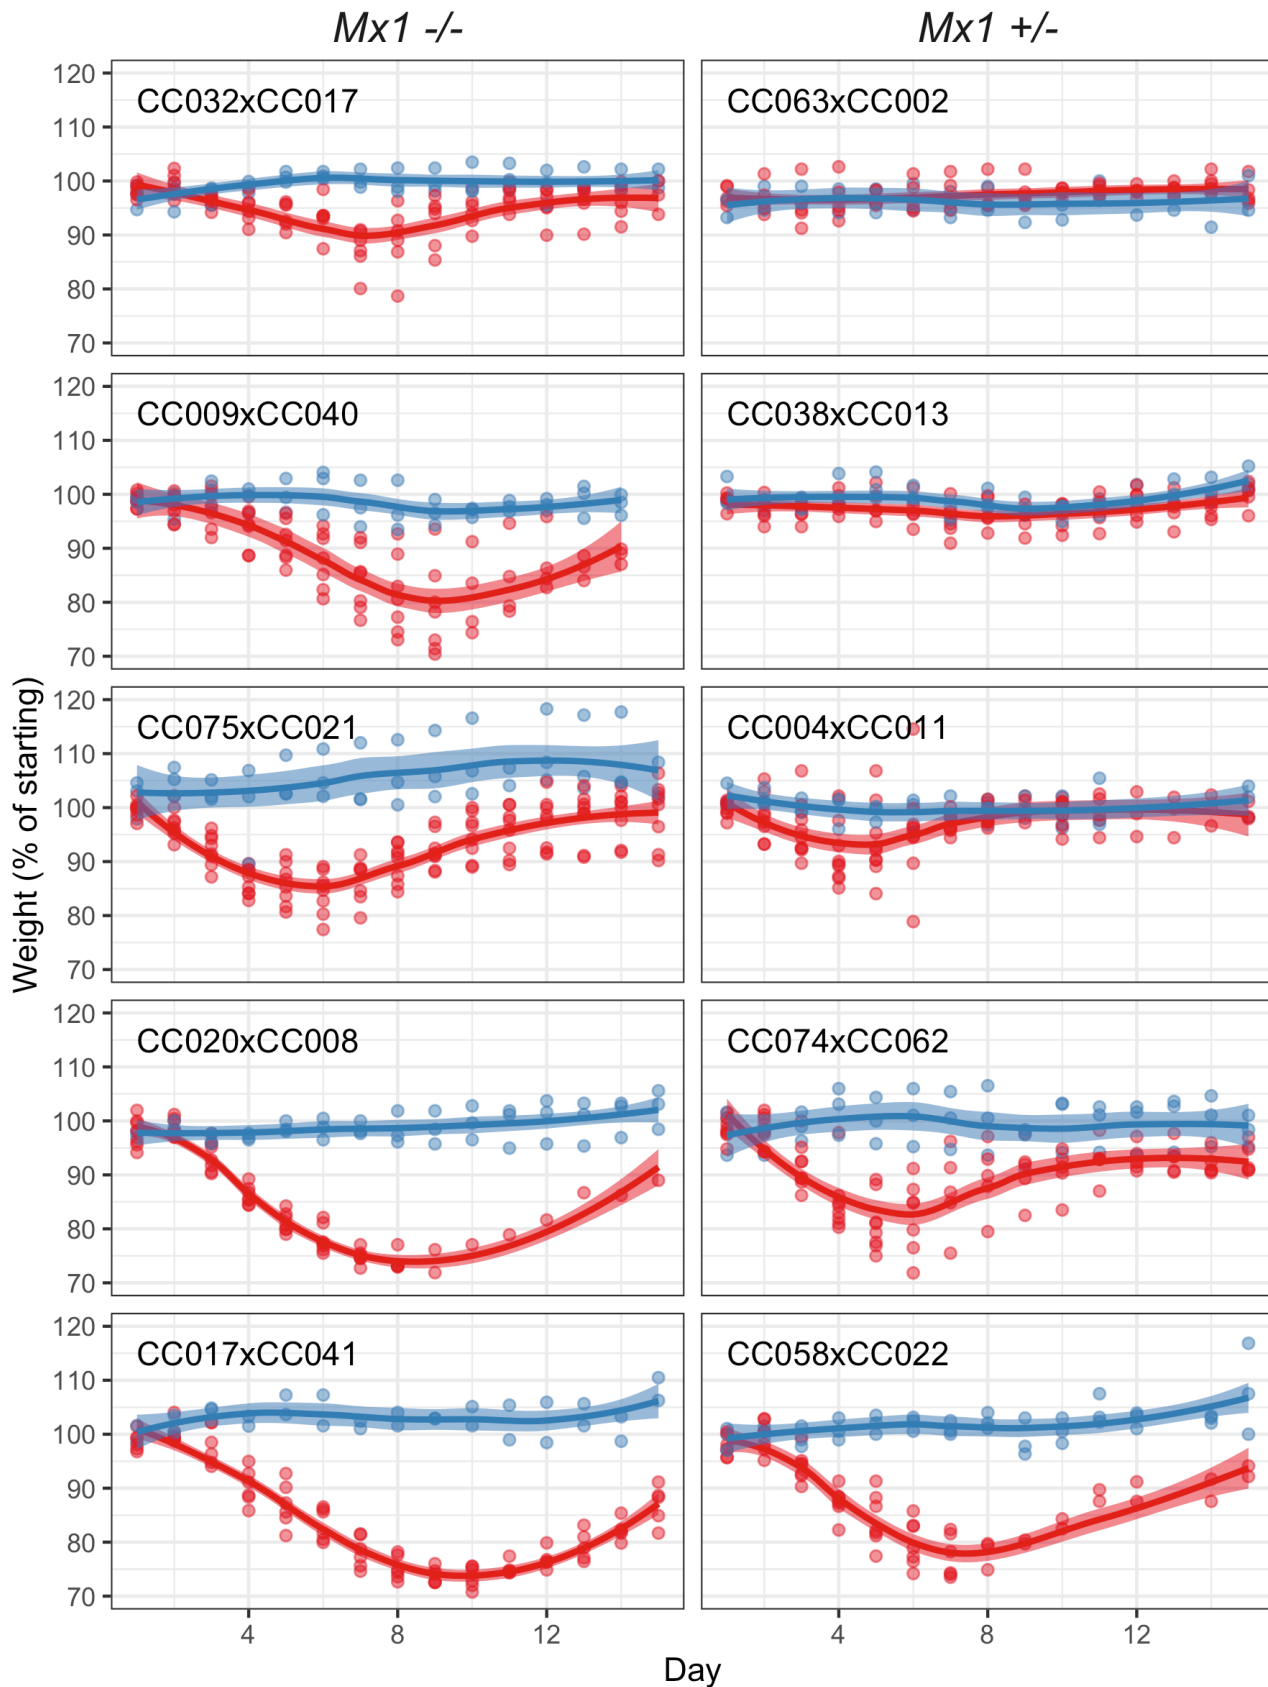

**Figure S2. CC-F1 population exhibits broad variation in IAV-induced weight loss.** While the IAV resistance gene *Mx1* is the strongest genetic driver of overall susceptibility to IAV, and *Mx1*-deficient animals showed increased weight loss overall, the F1 population showed significant variation in both the magnitude and kinetics of weight loss that was not solely dependent on *Mx1* haplotype (red = IAV infected, blue = mock treatment). Points represent individual mice, with weight loss trajectories fitted by Loess curves. Related to Figure 1.

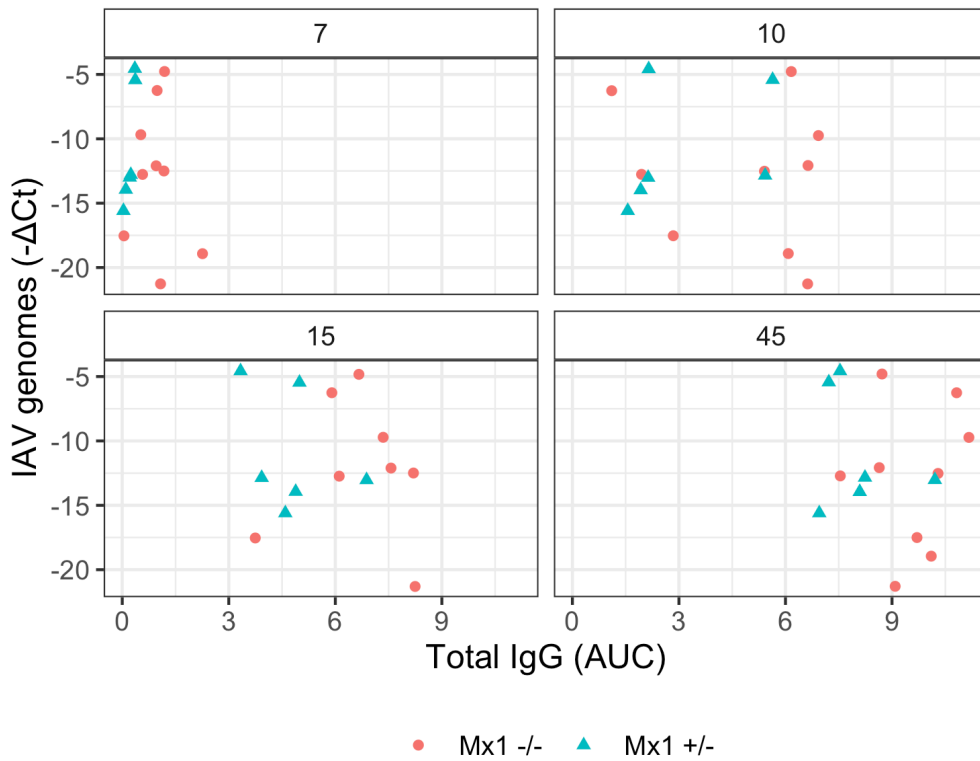

**Figure S3. IAV viral load is not associated with IgG response.** Lung viral load at day 2 post-infection was measured by RT-PCR (normalized to 18S) for a subset of CC-F1s selected for having either high or low antibody response at day 10 post-infection and compared to antibody response across days 7, 10, 15, and 45 (separate figure panels). Points represent mean values for CC-F1s, with approximately 3 mice per CC-F1. Related to Figure 1.

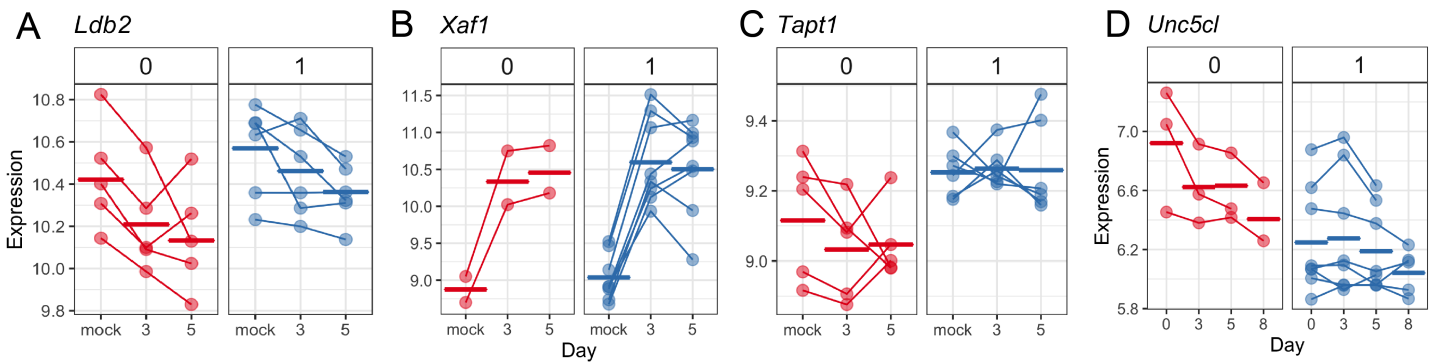

**Figure S4. Highlighted genes under *Ari* loci show haplotype- and/or IAV-specific differential expression.** Candidate genes under *Ari1-4* were evaluated for differential expression in the context of IAV infection and between haplotype groups using lung and blood transcriptional datasets from 11 CC strains infected with IAV H3N2 (Y-axis; log<sub>2</sub> transformed and normalized read counts). Each connected point represents the mean value for an individual CC strain, with 3-4 mice per strain. Numbers and color refer to haplotype groups (0/red = low, 1/blue = high) for each QTL. A) *Ldb2*, a candidate under *Ari4*, shows both IAV-induced and haplotype-specific differential expression in the lung (0 = A/J, 129S1/SvImJ, CAST/EiJ, WSB/EiJ, 1 = C57BL/6J, NOD/ShiLtJ, NZO/HILtJ, PwK/PhJ). B) *Xaf1*, under *Ari2*, shows IAV-induced differential expression but not haplotype-specific differential expression in the lung (0 = WSB/EiJ, 1 = else). C) *Tapt1*, a candidate under *Ari4*, shows haplotype-specific differential expression but not IAV-induced differential expression in the lung (0 = A/J, 129S1/SvImJ, CAST/EiJ, WSB/EiJ, 1 = C57BL/6J, NOD/ShiLtJ, NZO/HILtJ, PwK/PhJ). D) *Unc5cl*, a candidate under *Ari1*, shows both IAV-induced and haplotype-specific differential expression in the blood (0 = NOD/ShiLtJ, WSB/EiJ, 1 = else). Related to figure 5.

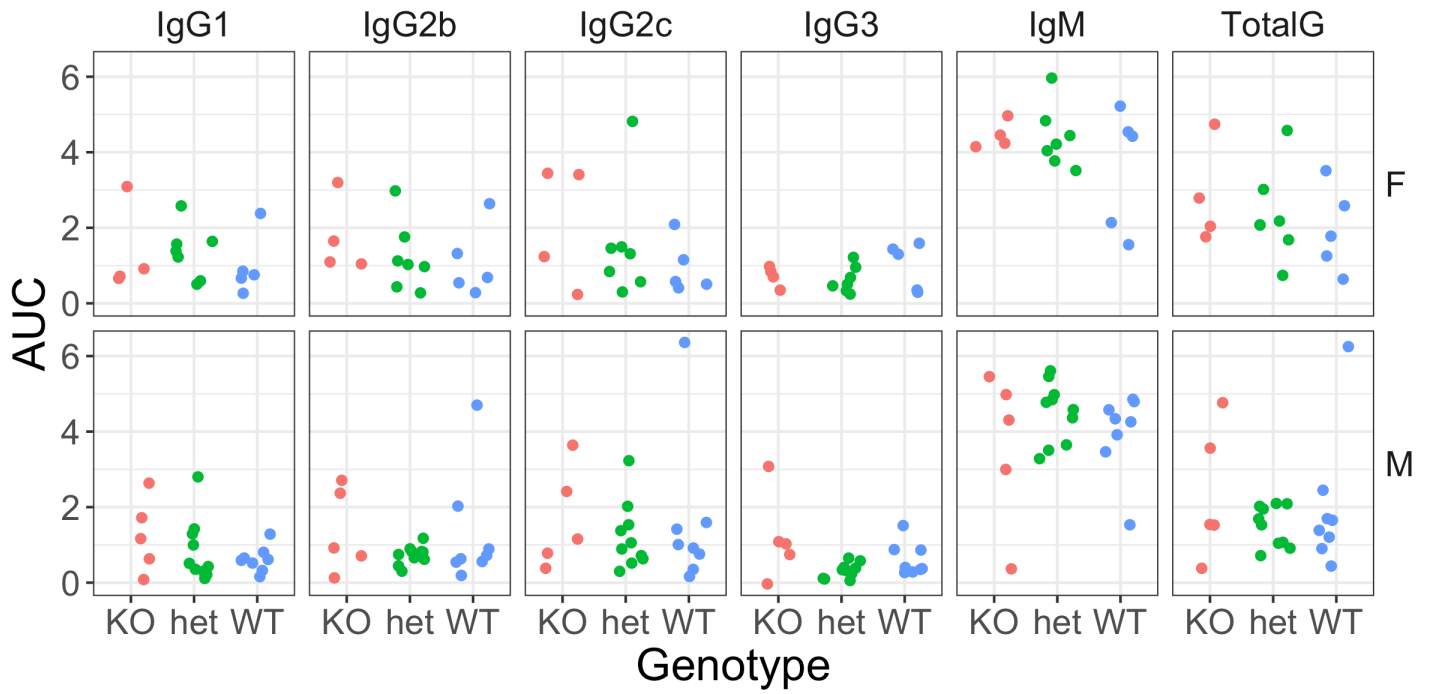

**Figure S5. *Nlrp1b* does not show a significant effect on antibody response to IAV.** *Nlrp1b* was investigated as a candidate under *Ari2*. *Nlrp1b*<sup>+/-</sup> mice were bred to produce an experimental cohort. No significant difference was observed in the antibody response between *Nlrp1b*<sup>-/-</sup> mice and littermate controls at 10 days post-infection. (x-axis: KO = *Nlrp1b*<sup>-/-</sup>, het = *Nlrp1b*<sup>+/-</sup>, WT = *Nlrp1b*<sup>+/+</sup>). Points represent individual mice, and are color coded by genotype and separated by sex. Related to table 2.

**Table S1.** Phenotypic heritability and QTL associations for individual timepoints and antibody types. P-values represent for associations between each phenotype and haplotype groups for *Ari1-4* and *Mx1* (\*:  $p < 0.1$ , \*\*:  $p < 0.05$ , \*\*\* $p < 0.01$ ). Related to figure 3, figure 4, and table 1.

| Isotype     | Day | Heritability | <i>Ari1</i> | <i>Ari2</i> | <i>Ari3</i> | <i>Ari4</i> | <i>Mx1</i>  |
|-------------|-----|--------------|-------------|-------------|-------------|-------------|-------------|
| IgG1        | 7   | 40.9%        | 1.5E-02 **  | 5.3E-02 *   | 5.0E-01     | 7.0E-01     | 8.2E-04 *** |
| IgG2a+IgG2c | 7   | 29.5%        | 1.4E-03 *** | 5.8E-03 *** | 1.3E-02 **  | 9.3E-01     | 5.3E-02 *   |
| IgG2b       | 7   | 25.9%        | 1.1E-01     | 5.4E-02 *   | 8.3E-02 *   | 1.5E-01     | 1.6E-01     |
| IgG3        | 7   | 36.7%        | 5.0E-02 **  | 2.3E-03 *** | 8.1E-03 *** | 2.1E-01     | 6.0E-05 *** |
| IgM         | 7   | 56.1%        | 3.9E-01     | 2.4E-01     | 4.9E-02 **  | 4.4E-01     | 2.7E-01     |
| Total IgG   | 7   | 46.5%        | 5.6E-02 *   | 3.3E-03 *** | 1.2E-03 *** | 7.8E-01     | 6.0E-02 *   |
| IgG1        | 10  | 43.9%        | 3.4E-05 *** | 8.4E-03 *** | 2.7E-01     | 4.1E-01     | 3.8E-02 **  |
| IgG2a+IgG2c | 10  | 41.7%        | 3.0E-02 **  | 1.3E-03 *** | 6.4E-02 *   | 5.4E-01     | 2.6E-01     |
| IgG2b       | 10  | 33.7%        | 1.7E-02 **  | 1.8E-03 *** | 2.7E-01     | 1.1E-01     | 8.2E-01     |
| IgG3        | 10  | 32.0%        | 4.8E-01     | 1.8E-06 *** | 1.1E-01     | 7.7E-01     | 9.1E-03 *** |
| IgM         | 10  | 46.5%        | 6.0E-02 *   | 1.4E-01     | 5.5E-02 *   | 7.8E-02 *   | 6.0E-02 *   |
| Total IgG   | 10  | 46.6%        | 1.5E-02 **  | 3.6E-03 **  | 3.8E-01     | 5.7E-01     | 1.4E-01     |
| IgG1        | 15  | 40.2%        | 4.2E-02 **  | 2.4E-01     | 2.1E-01     | 3.3E-01     | 4.6E-01     |
| IgG2a+IgG2c | 15  | 44.7%        | 5.8E-03 *** | 1.1E-01     | 3.8E-02 **  | 1.0E-02 **  | 3.1E-01     |
| IgG2b       | 15  | 49.2%        | 3.0E-01     | 7.8E-01     | 1.8E-01     | 5.4E-04 *** | 1.9E-01     |
| IgG3        | 15  | 39.8%        | 9.4E-01     | 1.1E-01     | 1.6E-01     | 2.8E-01     | 1.3E-02 **  |
| IgM         | 15  | 39.1%        | 2.6E-03 *** | 3.8E-02 **  | 2.6E-05 *** | 1.3E-03 *** | 3.6E-02 **  |
| Total IgG   | 15  | 44.0%        | 3.4E-02 **  | 1.8E-02 **  | 2.8E-02 **  | 7.0E-03 *** | 3.5E-01     |
| IgG1        | 45  | 46.5%        | 3.3E-02 **  | 3.9E-01     | 4.1E-01     | 3.1E-01     | 4.6E-02 **  |
| IgG2a+IgG2c | 45  | 61.4%        | 3.9E-01     | 1.2E-02 **  | 6.3E-01     | 6.8E-01     | 9.5E-02 *   |
| IgG2b       | 45  | 61.6%        | 5.3E-01     | 2.1E-01     | 1.2E-01     | 2.9E-01     | 4.1E-01     |
| IgG3        | 45  | 46.0%        | 7.0E-01     | 6.3E-02 *   | 4.7E-01     | 8.7E-01     | 1.3E-01     |
| IgM         | 45  | 52.3%        | 3.3E-01     | 8.9E-01     | 4.0E-01     | 9.8E-01     | 6.0E-01     |
| Total IgG   | 45  | 71.8%        | 6.5E-01     | 1.5E-02 **  | 3.8E-01     | 5.0E-01     | 3.6E-01     |

**Table S2.** Associations between maximal IAV-induced weight loss and antibody levels (not tested before day 10). (\*:  $p < 0.1$ , \*\*:  $p < 0.05$ , \*\*\* $p < 0.01$ ). Related to figure 1.

| Isotype     | Day | p-value      |
|-------------|-----|--------------|
| IgG1        | 10  | 2.90E-02 **  |
| IgG2a+IgG2c | 10  | 5.16E-01     |
| IgG2b       | 10  | 4.64E-01     |
| IgG3        | 10  | 5.94E-01     |
| IgM         | 10  | 3.48E-04 *** |
| Total IgG   | 10  | 2.06E-01     |
| IgG1        | 15  | 1.60E-02 **  |
| IgG2a+IgG2c | 15  | 8.72E-01     |
| IgG2b       | 15  | 4.49E-01     |
| IgG3        | 15  | 3.15E-01     |
| IgM         | 15  | 2.27E-01     |
| Total IgG   | 15  | 7.36E-01     |
| IgG1        | 45  | 1.04E-03 *** |
| IgG2a+IgG2c | 45  | 3.08E-01     |
| IgG2b       | 45  | 1.03E-01     |
| IgG3        | 45  | 5.61E-01     |
| IgM         | 45  | 6.88E-01     |
| Total IgG   | 45  | 3.67E-02 **  |



**Table S3.** All QTL ( $p < 0.2$ ) mapped for antibody magnitude. Related to figure 2 and table 1.

| <b>Name</b>  | <b>Day</b> | <b>Phenotype</b> | <b>Chr</b> | <b>p-value</b> | <b>Start (Mb)</b> | <b>Max (Mb)</b> | <b>End (Mb)</b> |
|--------------|------------|------------------|------------|----------------|-------------------|-----------------|-----------------|
| <i>Ari1</i>  | 7          | IgG2a+IgG2c      | 17         | 7.65E-02       | 47                | 52.6            | 54.4            |
| <i>Ari2</i>  | 10         | IgG3             | 11         | 2.80E-02       | 69.1              | 71.7            | 72.6            |
| <i>Ari3</i>  | 15         | IgM              | 8          | 8.15E-02       | 108.7             | 109.4           | 113.1           |
| <i>Ari4</i>  | 15-45      | IgG2b            | 5          | 3.95E-02       | 36.8              | 38.7            | 45.3            |
| <i>Ari5</i>  | 15         | IgG1             | 16         | 8.00E-02       | 40                | 40.6            | 44.7            |
| <i>Ari6</i>  | 15         | IgG2b            | 7          | 9.65E-02       | 109.1             | 114.3           | 115.5           |
| <i>Ari7</i>  | 45         | IgG3             | 9          | 7.35E-02       | 7.8               | 13.5            | 22.3            |
| <i>Ari8</i>  | 15-45      | Total IgG        | 15         | 9.45E-02       | 51.6              | 53.2            | 55              |
| <i>Ari9</i>  | 7          | IgG2a+IgG2c      | 16         | 1.97E-01       | 3.1               | 4.7             | 26.7            |
| <i>Ari10</i> | 10         | IgG1             | 5          | 1.34E-01       | 52.2              | 53.1            | 53.5            |
| <i>Ari11</i> | 10         | IgG2a+IgG2c      | 5          | 1.53E-01       | 58.6              | 73.7            | 81.6            |
| <i>Ari12</i> | 10         | IgG3             | 12         | 1.71E-01       | 112.5             | 117.7           | 120             |
| <i>Ari13</i> | 15         | Total IgG        | 15         | 2.10E-01       | 28.9              | 34.5            | 36.6            |
| <i>Ari14</i> | 45         | IgG1             | 1          | 1.85E-01       | 160.1             | 165             | 165.4           |
| <i>Ari15</i> | 45         | IgG2a+IgG2c      | 5          | 1.71E-01       | 130.9             | 132.6           | 135.5           |
| <i>Ari16</i> | 45         | IgG3             | 5          | 1.77E-01       | 127.2             | 133.6           | 134.9           |
| <i>Ari17</i> | 45         | Total IgG        | 5          | 1.09E-01       | 130.9             | 134.8           | 148.7           |
| <i>Ari18</i> | 45         | Total IgG        | 14         | 1.65E-01       | 103.3             | 105.6           | 109.4           |
| <i>Ari19</i> | 10-15      | IgG2b            | 14         | 1.66E-01       | 114               | 117.8           | 118.6           |
| <i>Ari20</i> | 15-45      | IgG1             | 7          | 1.55E-01       | 41.7              | 50.2            | 56              |
| <i>Ari21</i> | 15-45      | IgG2a+IgG2c      | X          | 1.04E-01       | 45.2              | 47.4            | 48              |
| <i>Ari22</i> | 15-45      | IgG2b            | X          | 1.42E-01       | 139.1             | 140             | 141.2           |
| <i>Ari23</i> | 7-10       | IgG2a+IgG2c      | 2          | 1.86E-01       | 16                | 24              | 27              |

**Table S4.** *Ari* loci associations with IAV-induced weight loss parameters (*Mxl*-corrected). Related to figure 3 and table 1.

|        | <i>Ari1</i> | <i>Ari2</i> | <i>Ari3</i> | <i>Ari4</i> |
|--------|-------------|-------------|-------------|-------------|
| Day 4  | 8.40E-01    | 2.14E-01    | 2.08E-01    | 9.19E-01    |
| Day 7  | 1.34E-01    | 3.26E-01    | 2.54E-01    | 3.16E-01    |
| Lowest | 3.84E-01    | 1.57E-01    | 5.82E-01    | 5.92E-01    |

**Table S5.** Summary counts of mapped QTL ( $p < 0.2$ ) across timepoints and antibody types. Related to figure 2.

| <b>Day</b>  | <b>IgM</b> | <b>IgG1</b> | <b>IgG2a+<br/>IgG2c</b> | <b>IgG2b</b> | <b>IgG3</b> | <b>Total IgG</b> | <b>Sum</b> |
|-------------|------------|-------------|-------------------------|--------------|-------------|------------------|------------|
| 7           | 0          | 0           | 2                       | 0            | 0           | 0                | 2          |
| 7-10 ratio  | 0          | 0           | 1                       | 0            | 0           | 0                | 1          |
| 10          | 0          | 1           | 1                       | 0            | 2           | 0                | 4          |
| 10-15 ratio | 0          | 0           | 0                       | 1            | 0           | 0                | 1          |
| 15          | 1          | 1           | 0                       | 1            | 0           | 1                | 4          |
| 15-45 ratio | 0          | 1           | 1                       | 2            | 0           | 1                | 5          |
| 45          | 0          | 1           | 1                       | 0            | 2           | 2                | 6          |
| Sum         | 1          | 4           | 6                       | 4            | 4           | 4                |            |

**Table S6.** *Ari* loci associations with SARS- and CHIKV- specific antibody. P-values for associations between each phenotype and each *Ari1-4* haplotypes. (Re = 4 days post-rechallenge) (\*:  $p < 0.1$ , \*\*:  $p < 0.05$ , \*\*\* $p < 0.01$ ). Related to figure 3 and table 1.

| Isotype     | Virus | Day | <i>Ari1</i> | <i>Ari2</i>  | <i>Ari3</i>  | <i>Ari4</i>  |
|-------------|-------|-----|-------------|--------------|--------------|--------------|
| IgG1        | SARS  | 7   | 9.58E-01    | 7.33E-03 *** | 9.10E-01     | 9.36E-01     |
| IgG2a+IgG2c | SARS  | 7   | 9.57E-01    | 1.40E-02 **  | 5.36E-01     | 9.46E-06 *** |
| IgG2b       | SARS  | 7   | 4.47E-01    | 1.14E-02 **  | 1.41E-01     | 9.61E-02 *   |
| IgG3        | SARS  | 7   | 6.58E-01    | 4.69E-04 *** | 5.97E-02 *   | 1.69E-03 *** |
| IgM         | SARS  | 7   | 8.37E-01    | 2.29E-02 **  | 3.86E-01     | 1.37E-04 *** |
| Total IgG   | SARS  | 7   | 9.25E-01    | 7.06E-02 *   | 9.05E-02 *   | 3.77E-04 *** |
| IgG1        | SARS  | 15  | 8.37E-01    | 8.51E-01     | 2.37E-01     | 1.51E-01     |
| IgG2a+IgG2c | SARS  | 15  | 4.16E-01    | 1.36E-01     | 7.00E-01     | 3.76E-03 *** |
| IgG2b       | SARS  | 15  | 8.06E-01    | 3.72E-01     | 7.68E-01     | 6.81E-01     |
| IgG3        | SARS  | 15  | 6.74E-01    | 4.01E-01     | 4.64E-01     | 2.95E-03 *** |
| IgM         | SARS  | 15  | 8.82E-01    | 4.80E-02 **  | 2.53E-01     | 2.56E-02 **  |
| Total IgG   | SARS  | 15  | 8.21E-01    | 7.51E-01     | 8.75E-01     | 7.62E-03 *** |
| IgG1        | SARS  | 29  | 1.08E-01    | 4.73E-02 **  | 7.87E-01     | 1.16E-01     |
| IgG2a+IgG2c | SARS  | 29  | 3.36E-01    | 1.76E-02 **  | 8.19E-01     | 1.85E-02 **  |
| IgG2b       | SARS  | 29  | 6.63E-01    | 2.02E-01     | 5.33E-01     | 2.77E-01     |
| IgG3        | SARS  | 29  | 4.18E-01    | 7.62E-02 *   | 3.51E-01     | 4.47E-02 **  |
| IgM         | SARS  | 29  | 7.08E-01    | 9.40E-03 *** | 4.21E-01     | 9.67E-02 *   |
| Total IgG   | SARS  | 29  | 5.90E-01    | 1.14E-01     | 5.76E-01     | 3.52E-02 **  |
| IgG1        | SARS  | Re  | 5.35E-01    | 7.68E-01     | 7.17E-01     | 6.14E-02 *   |
| IgG2a+IgG2c | SARS  | Re  | 2.64E-01    | 1.17E-02 **  | 5.93E-01     | 1.76E-01     |
| IgG2b       | SARS  | Re  | 8.27E-01    | 3.76E-01     | 4.16E-01     | 4.85E-01     |
| IgG3        | SARS  | Re  | 6.86E-01    | 1.27E-01     | 1.64E-01     | 2.05E-02 **  |
| IgM         | SARS  | Re  | 4.66E-01    | 8.45E-03 *** | 2.91E-02 **  | 6.18E-02 *   |
| Total IgG   | SARS  | Re  | 5.82E-01    | 5.86E-02 *   | 5.17E-01     | 1.34E-01     |
| IgG         | CHIKV | 7   | 9.49E-01    | 4.16E-01     | 3.13E-03 *** | 6.17E-01     |
| IgM         | CHIKV | 7   | 3.67E-01    | 7.06E-01     | 1.52E-02 **  | 1.44E-01     |
| FRNT50      | CHIKV | 7   | 6.52E-01    | 5.48E-01     | 1.17E-03 *** | 2.33E-01     |

**Table S7.** All genetic elements under QTL with SNPs above association testing thresholds. Related to figure 3, figure 5, table 1, and table 2.

| <b>QTL</b>  | <b>Genetic feature</b> | <b>Biotype</b>                                                   |
|-------------|------------------------|------------------------------------------------------------------|
| <i>Ari1</i> | <i>1700008K24Rik</i>   | lncRNA                                                           |
| <i>Ari1</i> | <i>Gm14871</i>         | processed_pseudogene                                             |
| <i>Ari1</i> | <i>Gm16555</i>         | lncRNA                                                           |
| <i>Ari1</i> | <i>Gm19585</i>         | lncRNA                                                           |
| <i>Ari1</i> | <i>Gm24071</i>         | snoRNA                                                           |
| <i>Ari1</i> | <i>Gm25201</i>         | snRNA                                                            |
| <i>Ari1</i> | <i>Gm27217</i>         | lncRNA                                                           |
| <i>Ari1</i> | <i>Kcnh8</i>           | protein_coding                                                   |
| <i>Ari1</i> | <i>Kif6</i>            | retained_intron, protein_coding, nonsense_mediated_decay         |
| <i>Ari1</i> | <i>Mdfr</i>            | lncRNA, protein_coding, retained_intron                          |
| <i>Ari1</i> | <i>n-R5s28</i>         | rRNA                                                             |
| <i>Ari1</i> | <i>Plcl2</i>           | protein_coding                                                   |
| <i>Ari1</i> | <i>Tbc1d5</i>          | lncRNA, protein_coding                                           |
| <i>Ari1</i> | <i>Unc5cl</i>          | protein_coding, nonsense_mediated_decay                          |
| <i>Ari2</i> | <i>4930401O10Rik</i>   | lncRNA                                                           |
| <i>Ari2</i> | <i>4933427D14Rik</i>   | protein_coding, nonsense_mediated_decay, lncRNA                  |
| <i>Ari2</i> | <i>6330403K07Rik</i>   | protein_coding, nonsense_mediated_decay                          |
| <i>Ari2</i> | <i>9230020A06Rik</i>   | lncRNA                                                           |
| <i>Ari2</i> | <i>C1qbp</i>           | protein_coding, retained_intron                                  |
| <i>Ari2</i> | <i>Derl2</i>           | protein_coding, nonsense_mediated_decay, retained_intron         |
| <i>Ari2</i> | <i>Dhx33</i>           | protein_coding, nonsense_mediated_decay, retained_intron, lncRNA |
| <i>Ari2</i> | <i>Fbxo39</i>          | protein_coding                                                   |
| <i>Ari2</i> | <i>Ggt6</i>            | protein_coding                                                   |
| <i>Ari2</i> | <i>Gm12321</i>         | processed_pseudogene                                             |
| <i>Ari2</i> | <i>Gm12322</i>         | processed_pseudogene                                             |
| <i>Ari2</i> | <i>Gm12324</i>         | lncRNA                                                           |
| <i>Ari2</i> | <i>Gm12325</i>         | lncRNA                                                           |
| <i>Ari2</i> | <i>Gm12326</i>         | lncRNA                                                           |
| <i>Ari2</i> | <i>Gm15377</i>         | processed_pseudogene                                             |
| <i>Ari2</i> | <i>Gm16013</i>         | lncRNA                                                           |
| <i>Ari2</i> | <i>Gm19967</i>         | lncRNA                                                           |
| <i>Ari2</i> | <i>Gm22297</i>         | snRNA                                                            |
| <i>Ari2</i> | <i>Gm22927</i>         | snoRNA                                                           |
| <i>Ari2</i> | <i>Gm23266</i>         | snoRNA                                                           |
| <i>Ari2</i> | <i>Gm23311</i>         | snoRNA                                                           |
| <i>Ari2</i> | <i>Gm33351</i>         | lncRNA                                                           |
| <i>Ari2</i> | <i>Gm43951</i>         | protein_coding                                                   |
| <i>Ari2</i> | <i>Gm48818</i>         | processed_pseudogene                                             |
| <i>Ari2</i> | <i>Mis12</i>           | protein_coding                                                   |
| <i>Ari2</i> | <i>Mybbp1a</i>         | retained_intron, protein_coding                                  |
| <i>Ari2</i> | <i>Nlrp1a</i>          | protein_coding                                                   |
| <i>Ari2</i> | <i>Nlrp1b</i>          | protein_coding, nonsense_mediated_decay                          |
| <i>Ari2</i> | <i>Nlrp1c-ps</i>       | transcribed_unprocessed_pseudogene, lncRNA                       |

|             |                      |                                                                  |
|-------------|----------------------|------------------------------------------------------------------|
| <i>Ari2</i> | <i>Nup88</i>         | protein_coding, retained_intron, nonsense_mediated_decay         |
| <i>Ari2</i> | <i>Pitpnm3</i>       | protein_coding, retained_intron                                  |
| <i>Ari2</i> | <i>Rabep1</i>        | protein_coding, retained_intron                                  |
| <i>Ari2</i> | <i>Rpain</i>         | protein_coding, nonsense_mediated_decay, retained_intron         |
| <i>Ari2</i> | <i>Rpl23a-ps2</i>    | processed_pseudogene                                             |
| <i>Ari2</i> | <i>Scimp</i>         | protein_coding                                                   |
| <i>Ari2</i> | <i>Slc13a5</i>       | protein_coding                                                   |
| <i>Ari2</i> | <i>Spns3</i>         | lncRNA, protein_coding                                           |
| <i>Ari2</i> | <i>Wscd1</i>         | protein_coding, retained_intron, lncRNA                          |
| <i>Ari2</i> | <i>Xafl</i>          | protein_coding, nonsense_mediated_decay, retained_intron         |
| <i>Ari3</i> | <i>9430091E24Rik</i> | lncRNA                                                           |
| <i>Ari3</i> | <i>Aars</i>          | protein_coding, retained_intron                                  |
| <i>Ari3</i> | <i>Adat1</i>         | protein_coding                                                   |
| <i>Ari3</i> | <i>Aplg1</i>         | retained_intron, protein_coding                                  |
| <i>Ari3</i> | <i>Atxn1l</i>        | protein_coding, lncRNA                                           |
| <i>Ari3</i> | <i>Bcar1</i>         | protein_coding, retained_intron                                  |
| <i>Ari3</i> | <i>Cfdp1</i>         | protein_coding                                                   |
| <i>Ari3</i> | <i>Chst5</i>         | protein_coding                                                   |
| <i>Ari3</i> | <i>Clec18a</i>       | lncRNA, nonsense_mediated_decay, protein_coding                  |
| <i>Ari3</i> | <i>Cntnap4</i>       | protein_coding, retained_intron, lncRNA                          |
| <i>Ari3</i> | <i>Cog4</i>          | protein_coding, lncRNA, nonsense_mediated_decay, retained_intron |
| <i>Ari3</i> | <i>Ctrb1</i>         | protein_coding                                                   |
| <i>Ari3</i> | <i>Ddx19b</i>        | protein_coding                                                   |
| <i>Ari3</i> | <i>Dhodh</i>         | protein_coding, retained_intron, lncRNA, nonsense_mediated_decay |
| <i>Ari3</i> | <i>Dhx38</i>         | protein_coding                                                   |
| <i>Ari3</i> | <i>Fa2h</i>          | lncRNA, protein_coding, retained_intron                          |
| <i>Ari3</i> | <i>Gabarapl2</i>     | protein_coding, retained_intron                                  |
| <i>Ari3</i> | <i>Glg1</i>          | protein_coding, nonsense_mediated_decay                          |
| <i>Ari3</i> | <i>Gm17720</i>       | protein_coding                                                   |
| <i>Ari3</i> | <i>Gm22193</i>       | snoRNA                                                           |
| <i>Ari3</i> | <i>Gm22664</i>       | misc_RNA                                                         |
| <i>Ari3</i> | <i>Gm22827</i>       | snRNA                                                            |
| <i>Ari3</i> | <i>Gm23163</i>       | miRNA                                                            |
| <i>Ari3</i> | <i>Gm23193</i>       | miRNA                                                            |
| <i>Ari3</i> | <i>Gm23627</i>       | snRNA                                                            |
| <i>Ari3</i> | <i>Gm23853</i>       | snRNA                                                            |
| <i>Ari3</i> | <i>Gm25321</i>       | snRNA                                                            |
| <i>Ari3</i> | <i>Gm26832</i>       | lncRNA                                                           |
| <i>Ari3</i> | <i>Gm26994</i>       | lncRNA                                                           |
| <i>Ari3</i> | <i>Gm45712</i>       | processed_pseudogene                                             |
| <i>Ari3</i> | <i>Gm45904</i>       | lncRNA                                                           |
| <i>Ari3</i> | <i>Gm6793</i>        | processed_pseudogene                                             |
| <i>Ari3</i> | <i>Hp</i>            | lncRNA, protein_coding                                           |
| <i>Ari3</i> | <i>Hydin</i>         | protein_coding, retained_intron                                  |
| <i>Ari3</i> | <i>Ist1</i>          | retained_intron, lncRNA, protein_coding                          |
| <i>Ari3</i> | <i>Kars</i>          | protein_coding, retained_intron, lncRNA                          |

|             |                      |                                                          |
|-------------|----------------------|----------------------------------------------------------|
| <i>Ari3</i> | <i>Mir7076</i>       | miRNA                                                    |
| <i>Ari3</i> | <i>Mkl1</i>          | protein_coding, lncRNA                                   |
| <i>Ari3</i> | <i>Mtss11</i>        | protein_coding, lncRNA                                   |
| <i>Ari3</i> | <i>Pdpr</i>          | protein_coding, nonsense_mediated_decay                  |
| <i>Ari3</i> | <i>Pkd113</i>        | protein_coding, retained_intron                          |
| <i>Ari3</i> | <i>Pmfbp1</i>        | lncRNA, protein_coding                                   |
| <i>Ari3</i> | <i>Rfwd3</i>         | protein_coding                                           |
| <i>Ari3</i> | <i>Sf3b3</i>         | protein_coding, retained_intron                          |
| <i>Ari3</i> | <i>Snord71</i>       | snoRNA                                                   |
| <i>Ari3</i> | <i>St3gal2</i>       | protein_coding, lncRNA                                   |
| <i>Ari3</i> | <i>Terf2ip</i>       | protein_coding, retained_intron                          |
| <i>Ari3</i> | <i>Tmem170</i>       | protein_coding                                           |
| <i>Ari3</i> | <i>Tmem231</i>       | nonsense_mediated_decay, protein_coding                  |
| <i>Ari3</i> | <i>Txnl4b</i>        | protein_coding                                           |
| <i>Ari3</i> | <i>Vac14</i>         | nonsense_mediated_decay, protein_coding                  |
| <i>Ari3</i> | <i>Zfhx3</i>         | protein_coding                                           |
| <i>Ari3</i> | <i>Zfp1</i>          | protein_coding, nonsense_mediated_decay                  |
| <i>Ari3</i> | <i>Zfp612</i>        | protein_coding, retained_intron                          |
| <i>Ari3</i> | <i>Zfp821</i>        | protein_coding, retained_intron                          |
| <i>Ari3</i> | <i>Znrf1</i>         | protein_coding, nonsense_mediated_decay, lncRNA          |
| <i>Ari4</i> | <i>4930431F12Rik</i> | lncRNA                                                   |
| <i>Ari4</i> | <i>C1qtnf7</i>       | protein_coding                                           |
| <i>Ari4</i> | <i>Cc2d2a</i>        | retained_intron, protein_coding                          |
| <i>Ari4</i> | <i>Fgfbp1</i>        | protein_coding                                           |
| <i>Ari4</i> | <i>Gm10205</i>       | pseudogene                                               |
| <i>Ari4</i> | <i>Gm15866</i>       | lncRNA                                                   |
| <i>Ari4</i> | <i>Gm42982</i>       | lncRNA                                                   |
| <i>Ari4</i> | <i>Gm42983</i>       | TEC                                                      |
| <i>Ari4</i> | <i>Gm42984</i>       | lncRNA                                                   |
| <i>Ari4</i> | <i>Gm43183</i>       | TEC                                                      |
| <i>Ari4</i> | <i>Gm43184</i>       | TEC                                                      |
| <i>Ari4</i> | <i>Gm5292</i>        | processed_pseudogene                                     |
| <i>Ari4</i> | <i>Ldb2</i>          | protein_coding, lncRNA, retained_intron                  |
| <i>Ari4</i> | <i>Prom1</i>         | protein_coding, retained_intron, nonsense_mediated_decay |
| <i>Ari4</i> | <i>Tapt1</i>         | nonsense_mediated_decay, retained_intron, protein_coding |
